# Supplementary material for: Elastic Wave Propagation in a Stainless-Steel Standard and Verification of a COMSOL Multiphysics Numerical Elastic Wave Toolbox
Source: MDPI journal article supplement (doi:10.3390/resources11050049), 2022-05-17
Supplement: s1 [file s1]

## Supplementary Materials:

### S1: Numerical model setup for anisotropic medium:

Considering a linear elastic material, the constitutive equations can be expressed in terms of generalized Hooke's law as follows:

$$\sigma_{ij} = C_{ijkl} \varepsilon_{kl} \quad i, j, k, l = 1, 2, 3 \quad (1)$$

where  $\sigma_{ij}$  and  $\varepsilon_{kl}$  are the components of the stress and strain tensors and  $C_{ijkl}$  are the elements of the fourth-order elastic tensor which has 81 components; in the case of isotropic materials, this number is reduced to 2 and the elastic tensor can be expressed as:

$$C_{ijkl} = \lambda \delta_{ij} \delta_{kl} + \mu (\delta_{ik} \delta_{jl} + \delta_{il} \delta_{jk}) \quad (2)$$

where  $\mu$  and  $\lambda$  are the Lamé's constants and  $\delta_{ij}$  is the Kronecker's delta. Using Voigt notation, the elastic tensor can be expressed as a  $6 \times 6$  matrix (e.g., Mavko et al., 2020):

$$[C] = \begin{bmatrix} 2\mu + \lambda & \lambda & \lambda & 0 & 0 & 0 \\ \lambda & 2\mu + \lambda & \lambda & 0 & 0 & 0 \\ \lambda & \lambda & 2\mu + \lambda & 0 & 0 & 0 \\ 0 & 0 & 0 & \mu & 0 & 0 \\ 0 & 0 & 0 & 0 & \mu & 0 \\ 0 & 0 & 0 & 0 & 0 & \mu \end{bmatrix} \quad (3)$$

The components of this matrix are stiffness components in which  $2\mu + \lambda$  is  $C_{11} = C_{22} = C_{33}$ ,  $\lambda$  is  $C_{12} = C_{23} = C_{31}$  and  $\mu$  is  $C_{44} = C_{55} = C_{66}$  for isotropic material, and these values are related to the speed of pressure and shear waves in the domain as follows:

$$V_p = \sqrt{\frac{C_{11}}{\rho}} \quad (4)$$

$$V_s = \sqrt{\frac{C_{44}}{\rho}} \quad (5)$$

where  $V_p$  and  $V_s$  are the speeds of pressure and shear waves. Such a model can be used for numerically model dynamic wave propagation in anisotropic materials with 1) extrinsic source of anisotropy such as existing poly materials and micro-cracks and 2) intrinsic source of anisotropy such as crystallographic preferred orientations. A numerical tool has been developed on COMSOL multi-physics, which provides a concrete framework to implement the above formulation by the finite element method. For this purpose, "solid mechanics" or "wave propagation" modules of the software can be employed.
